# Supplementary material for: Deciphering Antibody Responses to Orthonairoviruses in Ruminants
Source: MDPI journal article supplement (doi:10.3390/microorganisms9071493), 2021-07-13
Supplement: s1 [file s1]

Table S1: mVNT cross-reactivity results: HAZV, DUGV, NSDV

| Virus | Animal            | mVNT titer |          |          |
|-------|-------------------|------------|----------|----------|
|       |                   | HAZV       | DUGV     | NSDV     |
| HAZV  | HAZV-IMMU-calf-1  | Negative   | Negative | Negative |
|       | HAZV-IMMU-sheep-1 | 7          | Negative | 15       |
|       | Infected sheep    | Negative   | ND       | ND       |
|       | Infected cattle   | Negative   | ND       | ND       |
| DUGV  | DUGV-IMMU-calf-1  | Negative   | 99       | 24       |
|       | DUGV-IMMU-sheep-1 | Negative   | 47       | Negative |
|       | G5                | Negative   | 21       | Negative |
|       | G6                | Negative   | 12       | Negative |
|       | H5                | Negative   | 8        | Negative |
|       | H6                | Negative   | 30       | Negative |
|       | I2 (control)      | Negative   | Negative | Negative |
|       | J5                | Negative   | 26       | 13       |
|       | J6                | Negative   | 7        | Negative |
|       | K5                | Negative   | 37       | 12       |
|       | K6                | Negative   | Negative | Negative |
|       | L2 (control)      | Negative   | Negative | Negative |
| NSDV  | NSDV-IMMU-calf-1  | Negative   | Negative | 387      |
|       | NSDV-IMMU-sheep-1 | Negative   | Negative | 7        |
|       | N1                | 7          | 12       | 233      |
|       | N2                | Negative   | 13       | 41       |
|       | N3                | 8          | 9        | 295      |
|       | N4                | Negative   | 16       | 163      |
|       | M1                | Negative   | Negative | Negative |
|       | M2                | Negative   | Negative | Negative |
|       | M3                | Negative   | Negative | Negative |
|       | M4                | Negative   | Negative | Negative |
|       | P1                | Negative   | 7        | 226      |
|       | P2                | Negative   | Negative | 643      |
|       | P3                | Negative   | Negative | 264      |
|       | P4                | Negative   | Negative | Negative |
|       | O1 (control)      | Negative   | Negative | Negative |
|       | O2 (control)      | Negative   | Negative | Negative |
|       | Q5                | Negative   | Negative | 31       |
|       | Q6                | Negative   | Negative | 15       |
|       | R5                | Negative   | Negative | 44       |
|       | R6                | Negative   | Negative | 11       |
|       | S2 (control)      | Negative   | Negative | Negative |

ND: not determined

Negative: &lt;7

Table S2: PRNT cross-reactivity results: HAZV, DUGV, NSDV

| Virus | Animal            | PRNT <sub>80</sub> titer |          |          |
|-------|-------------------|--------------------------|----------|----------|
|       |                   | HAZV                     | DUGV     | NSDV     |
| HAZV  | HAZV-IMMU-calf-1  | 8                        | Negative | 8        |
|       | HAZV-IMMU-sheep-1 | Negative                 | 32       | 32       |
|       | Infected sheep    | Negative                 | ND       | ND       |
|       | Infected cattle   | Negative                 | ND       | ND       |
| DUGV  | DUGV-IMMU-calf-1  | Negative                 | 384      | 8        |
|       | DUGV-IMMU-sheep-1 | Negative                 | 512      | 16       |
|       | G5                | Negative                 | 32       | Negative |
|       | G6                | Negative                 | 12       | Negative |
|       | H5                | Negative                 | 16       | Negative |
|       | H6                | Negative                 | 64       | 8        |
|       | I2 (control)      | Negative                 | Negative | Negative |
|       | J5                | Negative                 | 256      | 64       |
|       | J6                | Negative                 | 24       | 8        |
|       | K5                | Negative                 | 384      | 64       |
|       | K6                | Negative                 | 48       | 8        |
|       | L2 (control)      | Negative                 | Negative | Negative |
| NSDV  | NSDV-IMMU-calf-1  | Negative                 | 48       | 1024     |
|       | NSDV-IMMU-sheep-1 | Negative                 | 12       | 32       |
|       | N1                | Negative                 | 320      | 1536     |
|       | N2                | Negative                 | 96       | 192      |
|       | N3                | Negative                 | 192      | 1536     |
|       | N4                | Negative                 | 320      | 2048     |
|       | M1                | Negative                 | 8        | 32       |
|       | M2                | Negative                 | Negative | 16       |
|       | M3                | Negative                 | 8        | 32       |
|       | M4                | Negative                 | Negative | 16       |
|       | P1                | Negative                 | 96       | 1536     |
|       | P2                | Negative                 | 384      | 4096     |
|       | P3                | Negative                 | 128      | 2048     |
|       | P4                | Negative                 | Negative | Negative |
|       | O1 (control)      | Negative                 | Negative | Negative |
|       | O2 (control)      | Negative                 | Negative | Negative |
|       | Q5                | Negative                 | 16       | 192      |
|       | Q6                | Negative                 | 48       | 48       |
|       | R5                | Negative                 | 128      | 256      |
|       | R6                | Negative                 | 24       | 96       |
|       | S2 (control)      | Negative                 | Negative | Negative |

ND: not determined

Negative: &lt;8
